# Supplementary material for: Structures and magnetic studies of four new Ni(ii) coordination polymers built using symmetrical tetracarboxylate and N-donor linkers
Source: Royal Society of Chemistry journal article supplement (doi:10.1039/d3nj03643j), 2023-01-01
Supplement: d3nj03643j1.pdf [file d3nj03643j1.pdf]

**Structures and magnetic studies of four new Ni(II) coordination  
polymers built by symmetrical tetracarboxylate and N-donor  
linkers**

**Contents**

**PXRD and Thermogravimetric Analysis**

**Figure S1.** The coordination modes of **L** in **1-4**.

**Figure S2.** Simulated and observed PXRD patterns of complexes **1-4**.

**Figure S3.** Infrared spectra of complexes **1-4**.

**Figure S4.** The TG curves of complexes **1-4**.

**Table S1.** Crystal data and structure refinement for complexes **1-4**.

**Table S2.** Selected Bond Lengths (Å) and angles (°) for complexes **1-4**.

**Table S3.** Hydrogen bond parameters [Å, °] for complex **2**.

**Table S4.** Structural comparison of various MOFs synthesized using the H<sub>4</sub>L ligand.

## PXRD and Thermogravimetric Analysis

To examine the crystalline purities of complexes **1-4**, powder X-ray diffraction (PXRD) experiments were conducted at room temperature. The patterns of the experiment are consistent with the simulated ones. The result shows that bulk products of the three compounds exhibit phase purity (Fig. S2). The slightly different diffraction intensities can be attributed to the preferred orientation effects.

The thermal stability of **1-4** was studied by thermal gravimetric analysis (TGA, Fig. S4). For **1**, the first step of the weight loss corresponds to the release of two coordination water molecules in the range of 150-220 °C (found 4.2%; calculated 4.5%).

The weight loss of more than 360 °C can be ascribed to the collapse of the lattice structure, and the decomposition of the organic linker. For **2**, the weight loss around 90 °C is 5.5%, which is ascribed to the release of two lattice water molecules (calcd. 5.8%).

The weight loss of more than 390 °C can be contributed to the collapse of the lattice structure, and the decomposition of the organic linker. For **3**, the first weight loss occurs from 140 to 230 °C, which is due to the release of one lattice water molecule (found 4.5%; calculated 3.7%). The organic components disintegrated above 410 °C.

For **2**, the TG curve shows a first weight loss from 100 to 200 °C, which corresponds to the loss of coordinated water molecules, and upon further heating, the structure is stable up to 340 °C, and then the structure decomposed at 350 °C.

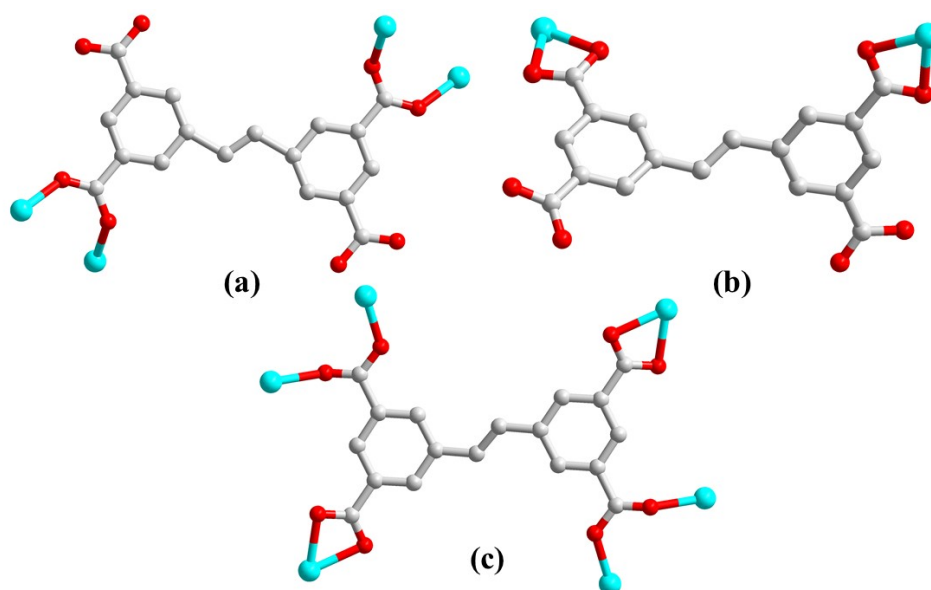

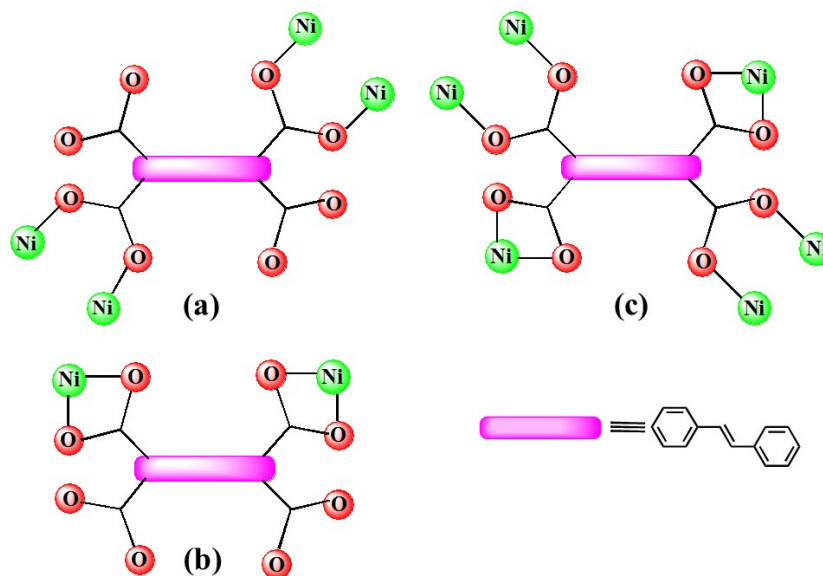

**Figure S1.** The coordination modes of L in 1-4.

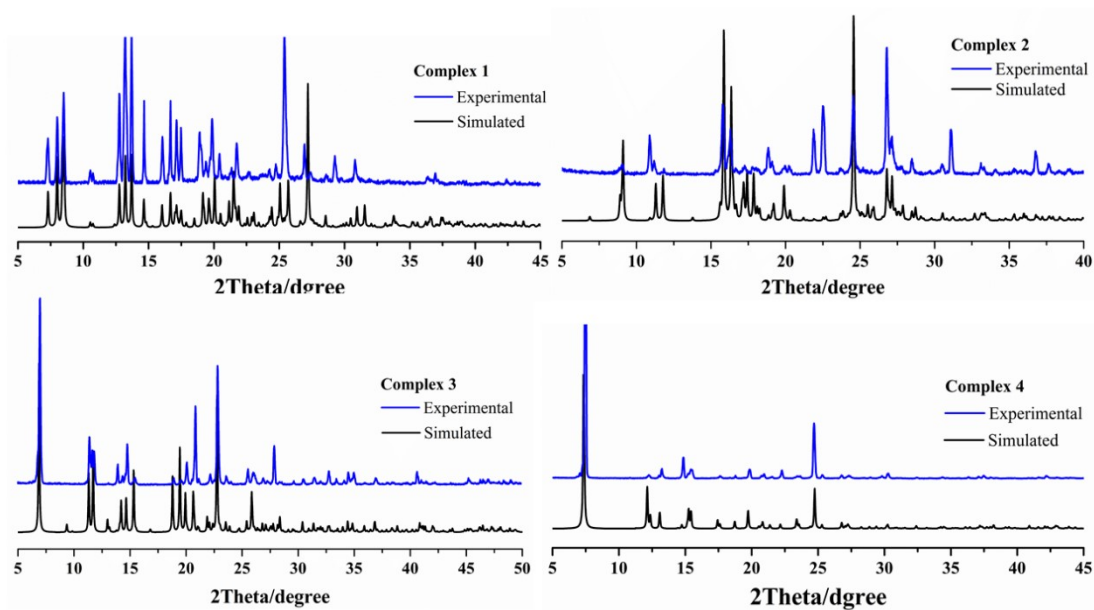

**Figure S2.** Simulated and observed PXRD patterns of complexes 1-4.

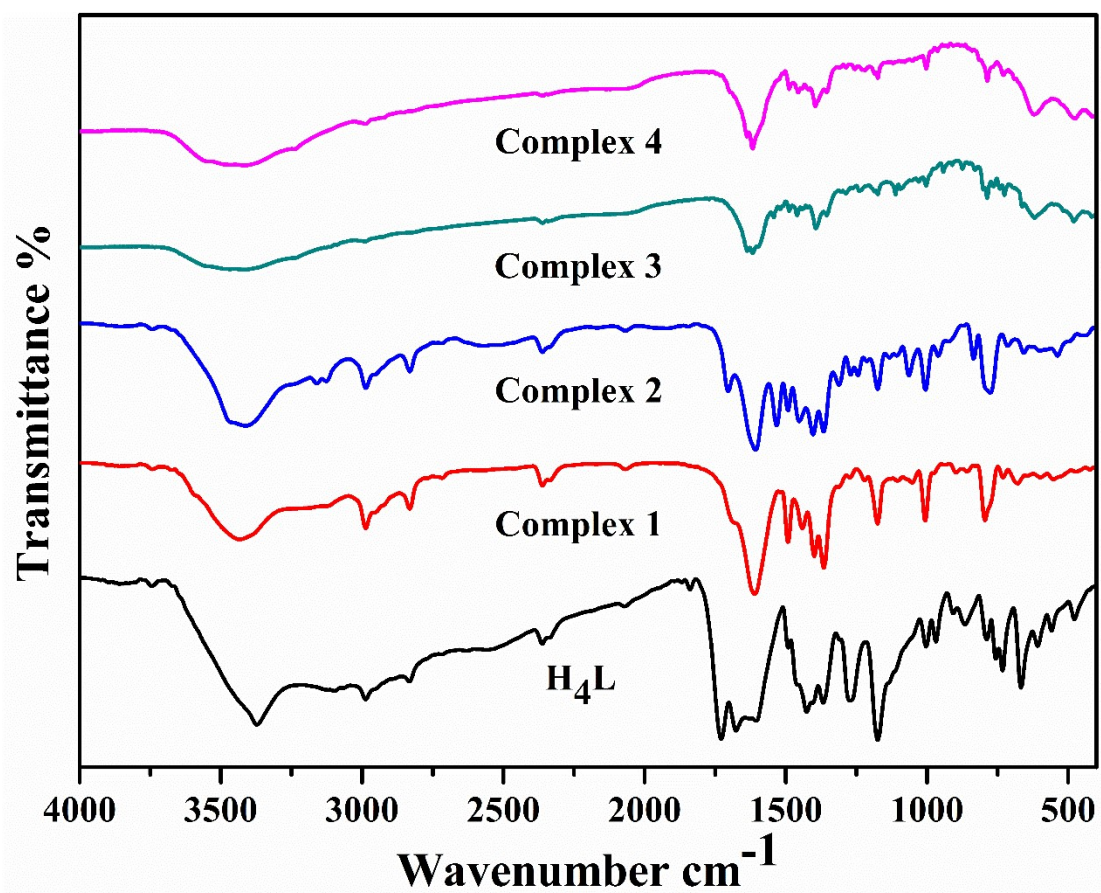

**Figure S3.** Infrared spectra of complexes 1-4.

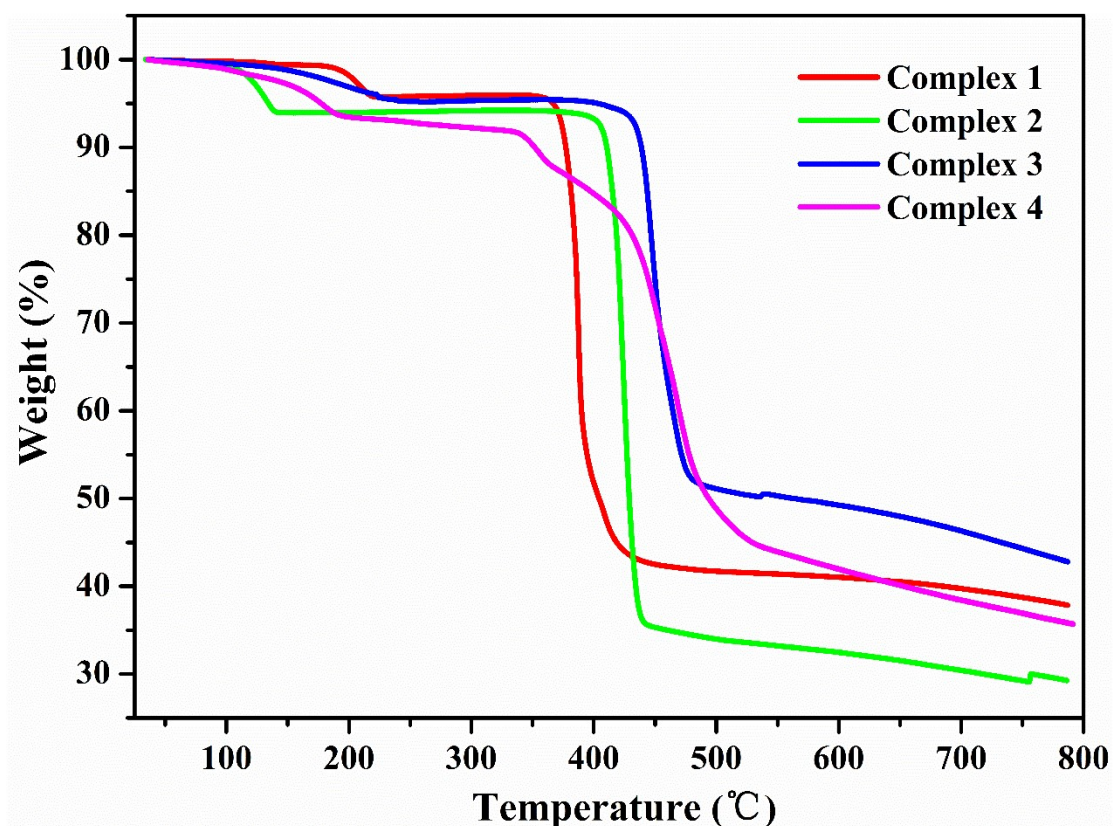

**Figure S4.** The TG curves of complexes 1-4.

**Table S1.** Crystal data and structure refinement for complexes 1-4.

| Complex             | 1                         | 2                         | 3                      | 4                      |
|---------------------|---------------------------|---------------------------|------------------------|------------------------|
| Empirical formula   | $C_{39}H_{28}N_2NiO_{14}$ | $C_{30}H_{23}N_4NiO_{10}$ | $C_{23}H_{20}N_4NiO_5$ | $C_{14}H_{10}N_2NiO_5$ |
| Formula weight      | 807.34                    | 658.23                    | 491.14                 | 344.95                 |
| Temperature (K)     | 293                       | 293                       | 293                    | 190                    |
| Wavelength (Å)      | 1.54184                   | 1.54184                   | 1.54184                | 1.34139                |
| Crystal system      | Triclinic                 | Triclinic                 | Triclinic              | Triclinic              |
| Space group         | <i>P</i> -1               | <i>P</i> -1               | <i>P</i> -1            | <i>P</i> -1            |
| Unit cell dimension |                           |                           |                        |                        |
| <i>a</i> (Å)        | 11.5719(10)               | 11.2470(8)                | 8.1814(6)              | 8.0206(3)              |
| <i>b</i> (Å)        | 11.9790(12)               | 11.3626(8)                | 10.0230(7)             | 9.7574(3)              |
| <i>c</i> (Å)        | 14.2548(15)               | 12.9121(7)                | 14.0209(8)             | 13.0392(4)             |
| $\alpha$ (°)        | 68.685(10)                | 86.947(5)                 | 70.905(6)              | 110.763(1)             |
| $\beta$ (°)         | 66.871(9)                 | 84.530(5)                 | 73.353(6)              | 90.633(2)              |
| $\gamma$ (°)        | 88.769(8)                 | 60.884(7)                 | 80.145(6)              | 112.746(2)             |

|                                                    |                                                      |                                                      |                                                    |                                                    |
|----------------------------------------------------|------------------------------------------------------|------------------------------------------------------|----------------------------------------------------|----------------------------------------------------|
| $V$ (Å <sup>3</sup> )                              | 1675.8(3)                                            | 1434.97(18)                                          | 1037.13(13)                                        | 866.89(5)                                          |
| $Z$                                                | 2                                                    | 2                                                    | 2                                                  | 2                                                  |
| $D_{\text{calc}}$ (Mg m <sup>-3</sup> )            | 1.600                                                | 1.523                                                | 1.573                                              | 1.322                                              |
| $\mu$ (mm <sup>-1</sup> )                          | 1.54                                                 | 1.56                                                 | 1.75                                               | 6.24                                               |
| $F(000)$                                           | 832                                                  | 678                                                  | 508                                                | 352                                                |
| Crystal size (mm)                                  | 0.12 × 0.11 × 0.11                                   | 0.14 × 0.11 × 0.07                                   | 0.08 × 0.08 × 0.07                                 | 0.16 × 0.16 × 0.14                                 |
| $\theta$ range (°)                                 | 3.7 to 70.9                                          | 5.4 to 69.8                                          | 4.7 to 71.2                                        | 4.5 to 54.0                                        |
| Index ranges                                       | -13 ≤ $h$ ≤ 13,<br>-14 ≤ $k$ ≤ 14,<br>-17 ≤ $l$ ≤ 12 | -13 ≤ $h$ ≤ 12,<br>-12 ≤ $k$ ≤ 13,<br>-15 ≤ $l$ ≤ 15 | -7 ≤ $h$ ≤ 9,<br>-11 ≤ $k$ ≤ 11,<br>-12 ≤ $l$ ≤ 16 | -7 ≤ $h$ ≤ 9,<br>-11 ≤ $k$ ≤ 11,<br>-12 ≤ $l$ ≤ 16 |
| Reflections collected                              | 10807                                                | 9126                                                 | 6388                                               | 3097                                               |
| Independent reflection                             | 5991 [ $R_{\text{int}} = 0.033$ ]                    | 5131 [ $R_{\text{int}} = 0.069$ ]                    | 3685 [ $R_{\text{int}} = 0.033$ ]                  | 3097 [ $R_{\text{int}} = 0.040$ ]                  |
| Data/restraints/parameters                         | 5991/1472/519                                        | 5131/0/413                                           | 3685/0/298                                         | 3097/0/204                                         |
| Final $R_1$ , $wR_2$ indices [ $I > 2\sigma(I)$ ]  | 0.049, 0.122                                         | 0.082, 0.251                                         | 0.041, 0.104                                       | 0.082, 0.225                                       |
| $R_1$ , $wR_2$ indices (all data)                  | 0.064, 0.135                                         | 0.090, 0.256                                         | 0.050, 0.112                                       | 0.092, 0.231                                       |
| GOF                                                | 1.05                                                 | 1.10                                                 | 1.05                                               | 1.02                                               |
| $\Delta\rho_{\text{max,min}}$ (e Å <sup>-3</sup> ) | 0.42/-0.42                                           | 1.69/-0.77                                           | 0.39/-0.47                                         | 1.00/-0.62                                         |

**Table S2.** Selected Bond Lengths (Å) and angles (°) for complexes **1-4**.

| Complex 1    |            |             |            |         |           |
|--------------|------------|-------------|------------|---------|-----------|
| Ni1-O14      | 2.027 (2)  | Ni1-O14     | 2.027 (2)  | Ni1-N2  | 2.087 (2) |
| Ni1-O1       | 2.038 (2)  | Ni1-O1      | 2.038 (2)  | Ni1-O13 | 2.195 (2) |
| O14-Ni1-O1   | 93.77 (9)  | N1-Ni1-N2   | 80.42 (9)  |         |           |
| O14-Ni1-N1   | 175.67 (9) | O2#1-Ni1-N2 | 88.46 (10) |         |           |
| O1-Ni1-N1    | 90.56 (9)  | O14-Ni1-O13 | 83.71 (9)  |         |           |
| O14-Ni1-O2#1 | 94.28 (8)  | O1-Ni1-O13  | 79.97 (9)  |         |           |

|             |            |              |            |
|-------------|------------|--------------|------------|
| O1-Ni1-O2#1 | 100.46 (9) | N1-Ni1-O13   | 97.01 (9)  |
| N1-Ni1-O2#1 | 84.97 (9)  | O2#1-Ni1-O13 | 177.97 (8) |
| O14-Ni1-N2  | 95.30 (9)  | N2-Ni1-O13   | 91.46 (10) |
| O1-Ni1-N2   | 166.77 (9) |              |            |

Symmetry codes for #1  $-x+1, -y+2, -z+1$ ; #2  $-x, -y+2, -z+2$ .

---

**Complex 2**

---

|             |             |          |               |          |             |
|-------------|-------------|----------|---------------|----------|-------------|
| Ni1-N3      | 2.015 (5)   | Ni1-O1   | 2.110 (4)     | Ni1-O6#1 | 2.117 (4)   |
| Ni1-N1      | 2.031 (5)   | Ni1-O5#1 | 2.113 (4)     | Ni1-O2   | 2.141 (4)   |
| N3-Ni1-N1   | 96.57 (19)  |          | O1-Ni1-O6#1   |          | 93.74 (16)  |
| N3-Ni1-O1   | 98.86 (18)  |          | O5#1-Ni1-O6#1 |          | 62.51 (15)  |
| N1-Ni1-O1   | 99.21 (18)  |          | N3-Ni1-O2     |          | 159.79 (18) |
| N3-Ni1-O5#1 | 100.17 (18) |          | N1-Ni1-O2     |          | 93.31 (17)  |
| N1-Ni1-O5#1 | 101.77 (17) |          | O1-Ni1-O2     |          | 62.05 (15)  |
| O1-Ni1-O5#1 | 149.70 (16) |          | O5#1-Ni1-O2   |          | 94.99 (16)  |
| N3-Ni1-O6#1 | 91.38 (18)  |          | O6#1-Ni1-O2   |          | 83.80 (16)  |
| N1-Ni1-O6#1 | 163.54 (17) |          |               |          |             |

Symmetry codes for #1  $x, y, z+1$ ; #2  $x, y, z-1$ ; #3  $-x+2, -y-1, -z+1$ ; #4  $-x+3, -y, -z$ .

---

**Complex 3**

---

|               |             |          |               |        |             |
|---------------|-------------|----------|---------------|--------|-------------|
| Ni1-O4#1      | 2.0136 (16) | Ni1-N4#3 | 2.064 (2)     | Ni1-O1 | 2.1405 (16) |
| Ni1-O3#2      | 2.0546 (16) | Ni1-N1   | 2.070 (2)     | Ni1-O2 | 2.1658 (16) |
| O4#1-Ni1-O3#2 | 102.91 (7)  |          | O4#1-Ni1-O3#2 |        | 102.91 (7)  |
| O4#1-Ni1-N4#2 | 89.56 (8)   |          | O4#1-Ni1-N4#2 |        | 89.56 (8)   |
| O3#2-Ni1-N4#2 | 84.99 (8)   |          | O3#2-Ni1-N4#2 |        | 84.99 (8)   |
| O4#1-Ni1-N1   | 95.94 (8)   |          | O4#1-Ni1-N1   |        | 95.94 (8)   |
| O3#2-Ni1-N1   | 91.28 (8)   |          | O3#2-Ni1-N1   |        | 91.28 (8)   |
| N4#2-Ni1-N1   | 173.94 (8)  |          | N4#2-Ni1-N1   |        | 173.94 (8)  |
| O4#1-Ni1-O1   | 156.16 (7)  |          | O4#1-Ni1-O1   |        | 156.16 (7)  |

O3#2-Ni1-O1 100.51 (7)

Symmetry codes for #1  $x, y+1, z$ ; #2  $-x, -y+1, -z+2$ ; #3  $x-1, y, z+1$ ; #4  $-x, -y, -z+3$ ; #5  $x, y-1, z$ ; #6  $x+1, y, z-1$ .

---

| Complex 4    |             |                |           |           |            |
|--------------|-------------|----------------|-----------|-----------|------------|
| Ni01-O1      | 2.014 (5)   | Ni01-O2#1      | 2.056 (5) | Ni01-O3#2 | 2.085 (5)  |
| Ni01-O5      | 2.050 (6)   | Ni01-N1        | 2.069 (6) | Ni01-O4#2 | 2.213 (5)  |
| O1-Ni01-O5   | 83.9 (2)    | O2#1-Ni01-O3#2 |           |           | 96.11 (19) |
| O1-Ni01-O2#1 | 91.45 (19)  | N1-Ni01-O3#2   |           |           | 94.4 (2)   |
| O5-Ni01-O2#1 | 175.3 (2)   | O1-Ni01-O4#2   |           |           | 94.08 (18) |
| O1-Ni01-N1   | 110.5 (2)   | O5-Ni01-O4#2   |           |           | 90.4 (2)   |
| O5-Ni01-N1   | 89.9 (3)    | O2#1-Ni01-O4#2 |           |           | 89.47 (19) |
| O2#1-Ni01-N1 | 92.1 (2)    | N1-Ni01-O4#2   |           |           | 155.3 (2)  |
| O1-Ni01-O3#2 | 153.66 (19) | O3#2-Ni01-O4#2 |           |           | 60.91 (17) |
| O5-Ni01-O3#2 | 87.9 (2)    |                |           |           |            |

Symmetry codes for #1  $-x+2, -y+2, -z+1$ ; #2  $x+1, y+1, z$ ; #3  $-x+1, -y+1, -z$ ; #4  $-x+2, -y+3, -z+2$ ; #5  $x-1, y-1, z$ .

**Table S3.** Hydrogen bond parameters [ $\text{\AA}$ ,  $^\circ$ ] for complex **2**.

---

| Compound 2      |      |       |           |         |
|-----------------|------|-------|-----------|---------|
| D-H...A         | D-H  | H...A | D...A     | D-H...A |
| O1S-H1S1...N2#2 | 0.98 | 2.39  | 3.1207(1) | 131     |
| O1S-H1S3...O1#4 | 0.98 | 2.19  | 2.9155(1) | 129     |
| O5-H5B...O3#1   | 0.98 | 1.66  | 2.6344(1) | 169     |
| O5-H5C...O3#2   | 0.96 | 1.78  | 2.6895(1) | 157     |
| O6-H6A...O4#3   | 0.97 | 1.70  | 2.6620(1) | 167     |
| O6-H6B...O1     | 0.97 | 1.61  | 2.5748(1) | 169     |
| O6-H6B...O2     | 0.97 | 2.42  | 2.8907(1) | 109     |
| C19-H19...O4#3  | 0.95 | 2.20  | 3.1473(1) | 171     |

Symmetry code: #1  $1-x, -y, -z$ ; #2  $x, y, 1+z$ ; #3  $-1+x, y, 1+z$ ; #4  $1+x, y, z$ .



**Table S4.** Structural comparison of various MOFs synthesized using the H<sub>4</sub>L ligand.

| Formula                                                                            | Ligand                                                                              | Ancillary ligand | structure                                                                            | dimension | Ref       |
|------------------------------------------------------------------------------------|-------------------------------------------------------------------------------------|------------------|--------------------------------------------------------------------------------------|-----------|-----------|
| C <sub>14</sub> H <sub>14</sub> NNiO <sub>10</sub>                                 | 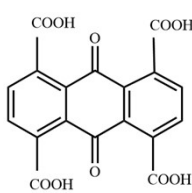   | bpy              |    | 3D        | [1]       |
| C <sub>24</sub> H <sub>23</sub> NiN <sub>2</sub> O <sub>6</sub>                    |    | bpp              |    | 3D        | [2]       |
| C <sub>46</sub> H <sub>42</sub> Ni <sub>2</sub> N <sub>4</sub> O <sub>1</sub><br>8 |   | phen             |   | 3D        | [3]       |
| C <sub>16</sub> H <sub>13</sub> NNiO <sub>6</sub>                                  |  | 4,4'-bpy         |  | 3D        | [4]       |
| C <sub>50</sub> H <sub>50</sub> N <sub>4</sub> Ni <sub>2</sub> O <sub>1</sub><br>4 |  | bpp              |  | 3D        | [5]       |
| C <sub>24</sub> H <sub>19</sub> N <sub>4</sub> NiO <sub>6</sub>                    |  | dib              |  | 2D        | [6]       |
| C <sub>39</sub> H <sub>28</sub> N <sub>2</sub> NiO <sub>14</sub>                   |  | 1,10-phen        |  | 1D        | This work |

|                           |                                                                                   |     |                                                                                    |    |           |
|---------------------------|-----------------------------------------------------------------------------------|-----|------------------------------------------------------------------------------------|----|-----------|
| $C_{30}H_{23}N_4NiO_{10}$ | 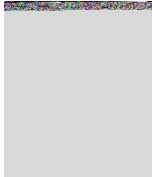 | dib |  | 2D | This work |
| $C_{23}H_{20}N_4NiO_5$    |  | bix |  | 3D | This work |
| $C_{14}H_{10}N_2NiO_5$    |  | dpa |  | 3D | This work |

## References

- [1] Y. Liu, R. He, F. Wang, C. Lu and Q. Meng, *Inorganic Chemistry Communications*, 2010, 13, 1375–1379.
- [2] C. Wang, J. Zhao, L. Xia, X.-Q. Wu, J.-F. Wang, W.-W. Dong and Y.-P. Wu, *Journal of Solid State Chemistry*, 2016, 238, 273–278.
- [3] M. Yu, M. Hu, Z. Wu and H. Su, *Inorganica Chimica Acta*, 2013, 408, 84–90.
- [4] X. Lv, L. Liu, C. Huang, L. Guo, J. Wu, H. Hou and Y. Fan, *Dalton Trans.*, 2014, 43, 15475–15481.
- [5] J. Zhang, J. Yang, X. Wang, H. Zhang, X. Chi, Q. Yang, Y. Chen and D. Xiao, *Inorganica Chimica Acta*, 2016, 447, 66–76.
- [6] X. Zhang, P. Fu, D. Xiong, Y. Li and X. Dong, *Journal of Molecular Structure*, 2022, 1261, 132889.
